# Supplementary material for: Directly grown carbon nanotube based hybrid electrodes with enhanced thermo-cell performances
Source: Royal Society of Chemistry journal article supplement (doi:10.1039/c7ra02264f), 2017-01-01
Supplement: c7ra02264f1.pdf [file c7ra02264f1.pdf]

## Electronic Supplementary Information

### Direct grown carbon nanotube based hybrid electrodes with enhanced thermo-cell performances

Fang Zhao, Weijin Qian,\* Mengjie Li, Wei Li, Lihong Chen, Fengying Zhong, Weijun Huang and Changkun Dong\*

Institute of Micro-nano Structures & Optoelectronics, Wenzhou University, Chashan

University Town, Wenzhou, Zhejiang 325035, China

E-mail: weijinqian@wzu.edu.cn and dck@wzu.edu.cn

### Index

SI-1 The Cup-shaped TEC device

SI-2 XPS data on the elemental contents of the Ag-CNTs hybrid electrodes

SI-3 XPS peak analyses of the Fe2p and Cr2p

SI-4 Comparison of conductivity and thermal conductivity of the pristine CNTs and CNTs-based hybrids

SI-5 Internal resistance of the TEC with a variation of the temperature difference

SI-6 Effect of temperature difference on maximum specific output power

SI-7 Internal resistance of the TEC with a variation of the operation temperature

SI-8 Two identical cells connected in series

### References

## SI-1 The Cup-shaped TEC device

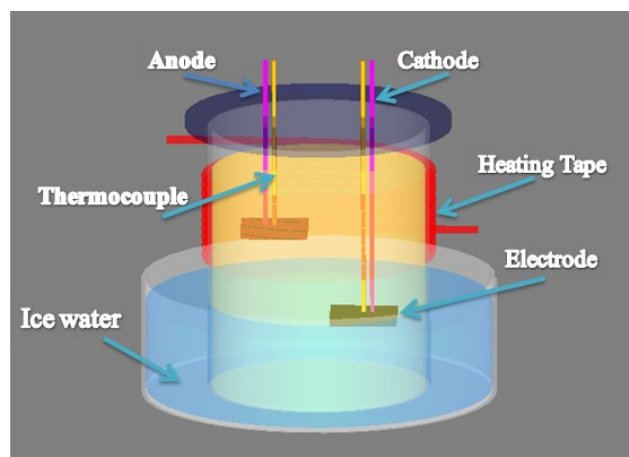

**Fig. S1** Schematic picture of the Cup-shaped TEC device

## SI-2 XPS data on the elemental contents of the Ag-CNTs hybrid electrodes

**Table S1** Comparison of the atomic concentrations of CNTs-based hybrids

| Sample     | C (%) | O (%) | Fe (%) | Cr (%) | Ag (%) |
|------------|-------|-------|--------|--------|--------|
| Ag-CNTs-5  | 90.22 | 4.53  | 1.23   | 3.21   | 0.81   |
| Ag-CNTs-10 | 89.19 | 3.63  | 1.15   | 3.43   | 2.6    |
| Ag-CNTs-20 | 87.57 | 3.49  | 1.24   | 3.11   | 4.59   |
| Ag-CNTs-30 | 86.15 | 3.89  | 1.31   | 3.02   | 5.63   |

## SI-3 XPS peak analyses of the Fe2p and Cr2p

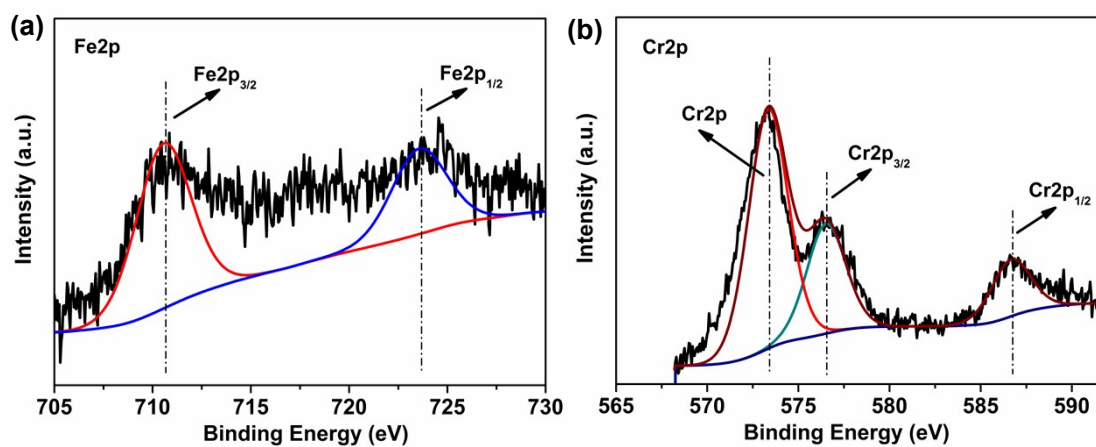

**Fig. S2** XPS spectra of Ag-CNTs sample. (a) Fe2p; (b) Cr2p.

As shown in Fig. S2a, XPS spectrum showed two peaks at 710.6 eV ( $\text{Fe}2p_{3/2}$ ) and 723.5 eV ( $\text{Fe}2p_{1/2}$ ), corresponding to the Fe-O bonds. <sup>1</sup>As for the Cr2p (Fig. S2b), two peaks from O-Cr bonds appeared at 576.5 eV ( $\text{Cr}2p_{3/2}$ ) and 586.7 eV ( $\text{Cr}2p_{1/2}$ ).<sup>2</sup>

SI-4 Comparison of conductivity and thermal conductivity of the pristine CNTs and CNTs-based hybrids

Table S2 Comparison of conductivity and thermal conductivity of the pristine CNTs and CNTs-based hybrids

| Sample     | conductivity ( $\Omega$ ) | Thermal conductivity ( $\text{W.m}^{-1}.\text{K}^{-1}$ ) |
|------------|---------------------------|----------------------------------------------------------|
| CNTs       | 11.92                     | 0.1023                                                   |
| Ag-CNTs-5  | 9.12                      | 0.3368                                                   |
| Ag-CNTs-10 | 5.65                      | 0.9344                                                   |
| Ag-CNTs-20 | 4.01                      | 1.0002                                                   |
| Ag-CNTs-30 | 2.80                      | 1.1096                                                   |

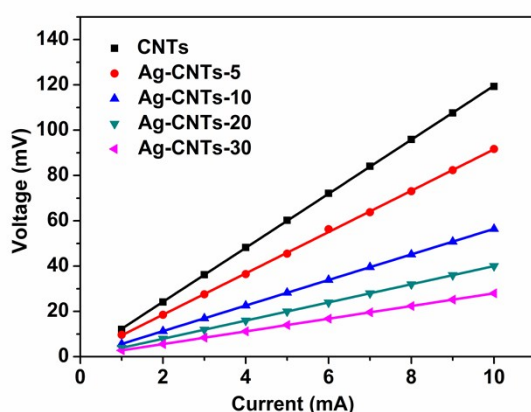

**Fig. S3** Four-probe current-voltage measurements of the pristine CNTs and the Ag-CNTs hybrids

SI-5 Internal resistance of the TEC with a variation of the temperature difference

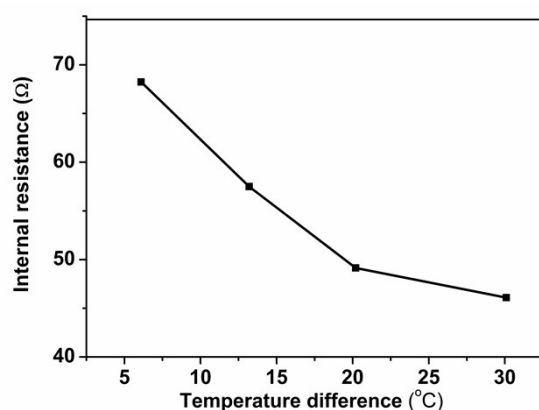

**Fig. S4** The relation between the internal resistance and the temperature difference

With the increasing temperature difference, the internal resistance of the cell decrease from  $68.2\ \Omega$  for  $\Delta T = 6.1^\circ\text{C}$  to  $46.1\ \Omega$  for  $\Delta T = 30.1^\circ\text{C}$ , which might be due to an increase of the ion conductivity of the electrolyte, similar case could be found in the porous nanocarbon electrodes.<sup>3</sup>

#### SI-6 Effect of temperature difference on maximum specific output power

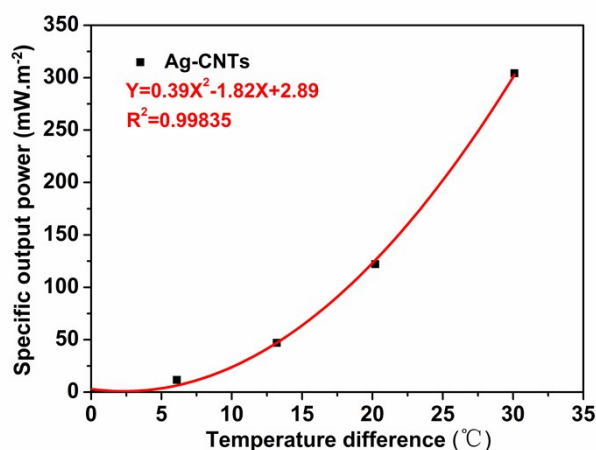

**Fig. S5** Specific output power vs temperature difference for the Ag-CNT electrode.

With the increasing temperature difference, the maximum specific output power ( $P_{\text{MAX}}$ ) increase from 11.5 to 304.2 mW.m<sup>-2</sup>. By fitting data, the  $P_{\text{MAX}}$  increase quadratically with the temperature difference.

#### SI-7 Internal resistance of the TEC with a variation of the operation temperature

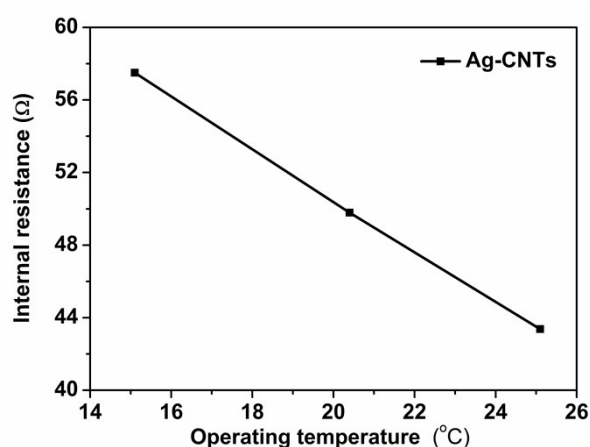

**Fig. S6** Internal resistance vs operating temperature for the Ag-CNTs electrode.

Under the same temperature difference ( $13.2^{\circ}\text{C}$ ), the internal resistance of the cell decrease by 24.5 % (from 57.5 to  $43.4\Omega$ ) with the increasing operating temperature.

#### SI-8 Two identical cells connected in series

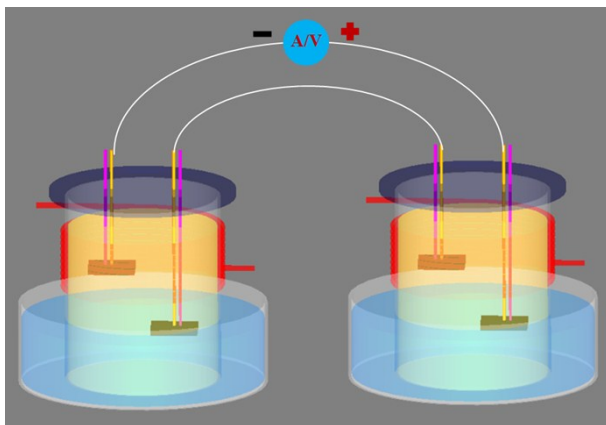

#### References

- 1 S. Palimar, S. D. Kaushik, V. Siruguri, D. Swain, A. E. Viegas, C. Narayana and N. G. Sundaram, Dalton Trans., 2016,45, 13547-13555.
- 2 S. Mishra, N. Verma, J. Ind.Eng. Chem., 2016, 36, 346–354.
- 3 T. J. Kang, S. L. Fang, M. E. Kozlov, C. S. Haines, N. Li, Y. H. Kim, Y. S. Chen, and R. H. Baughman, Adv. Funct. Mater., 2012, 22, 477–489.
